# Supplementary material
Source: publisher figshare collection journal article supplement (https://wiley.figshare.com/articles/dataset/_/3563253)

# *Mammalian phylogenetic diversity area relationships at a continental scale*

Florent Mazel\*, Julien Renaud, François Guilhaumon, David Mouillot,

Dominique Gravel & Wilfried Thuiller

## **Appendix A. Distribution of species richness and phylogenetic diversity values.**

For each continent (i.e. from Appendix A1 to A5), the distribution of diversity (species richness and phylogenetic diversity; SR and PD, respectively) is given across four different spatial scales.

### **1. North America**

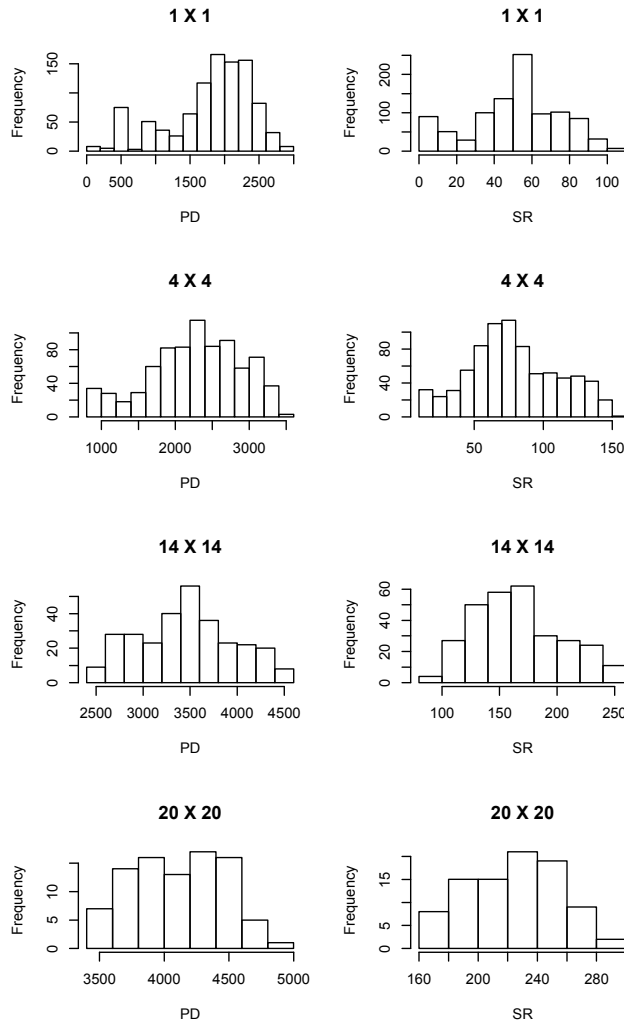

## 2. Eurasia

**1 X 1**

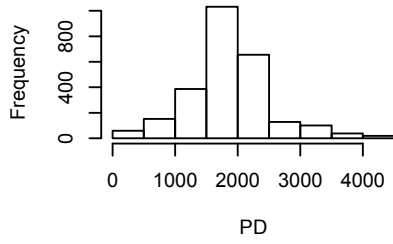

**1 X 1**

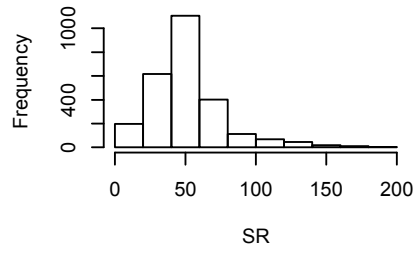

**4 X 4**

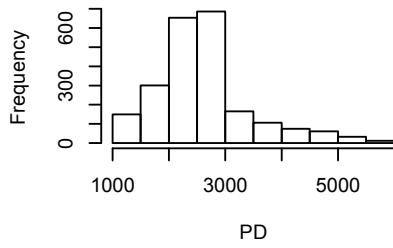

**4 X 4**

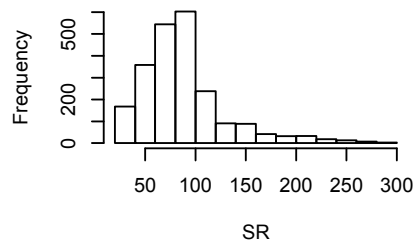

**14 X 14**

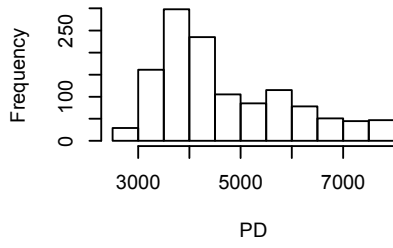

**14 X 14**

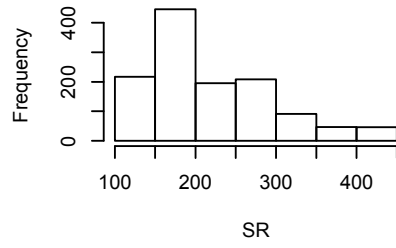

**20 X 20**

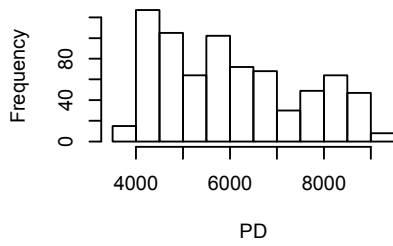

**20 X 20**

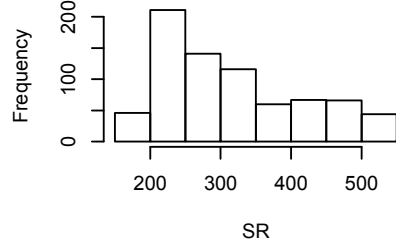

### 3. Africa

**1 X 1**

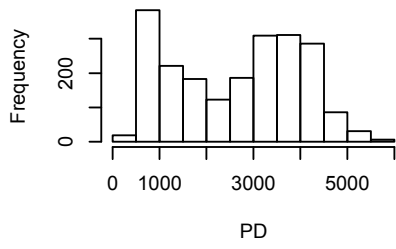

**1 X 1**

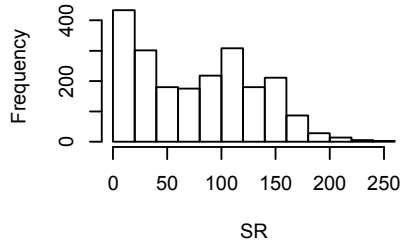

**4 X 4**

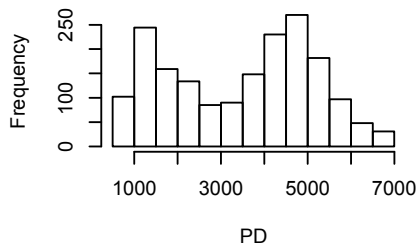

**4 X 4**

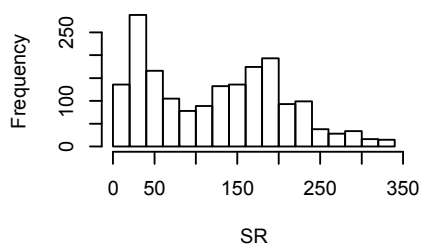

**14 X 14**

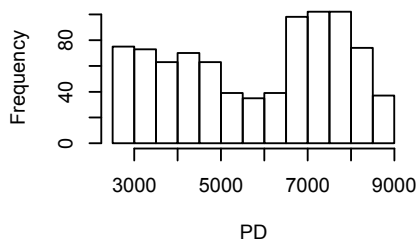

**14 X 14**

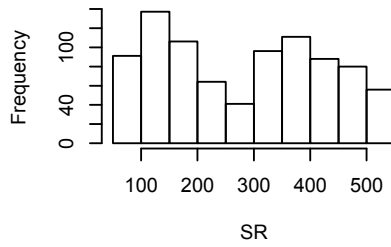

**20 X 20**

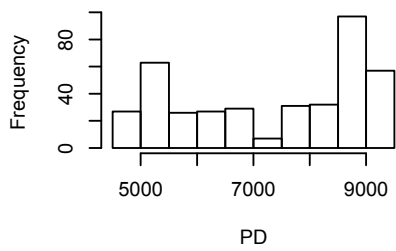

**20 X 20**

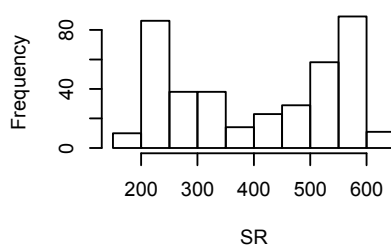

## 4. South America

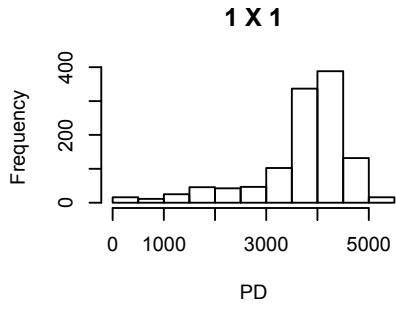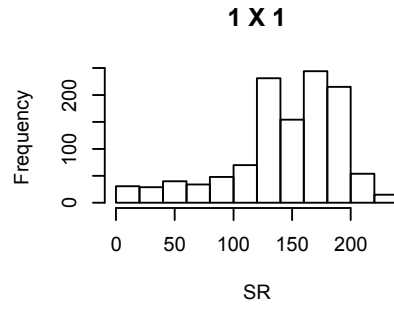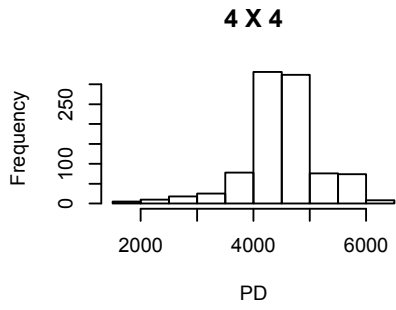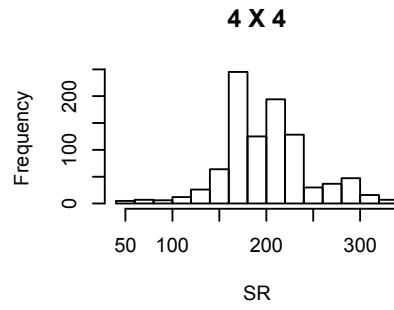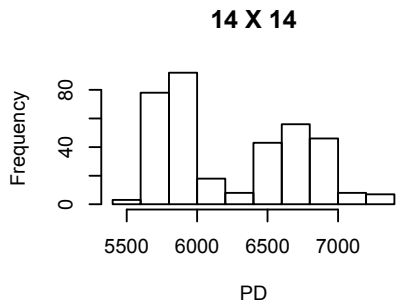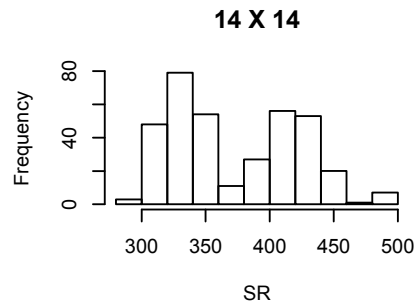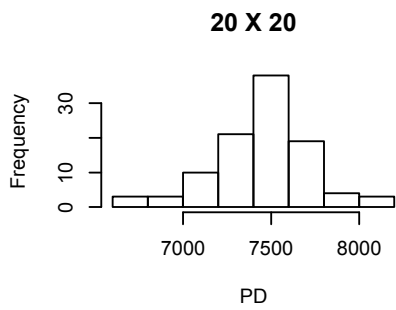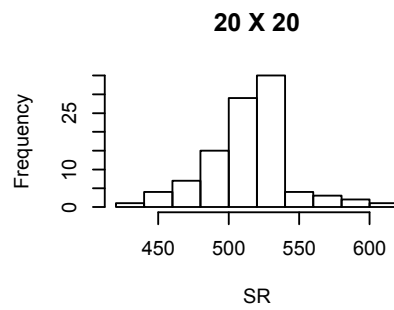

## 5. Australia

**1 X 1**

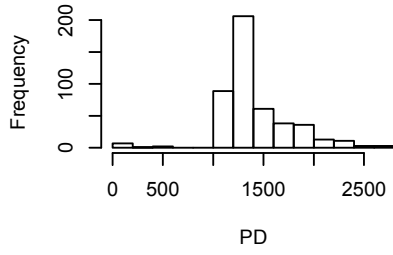

**1 X 1**

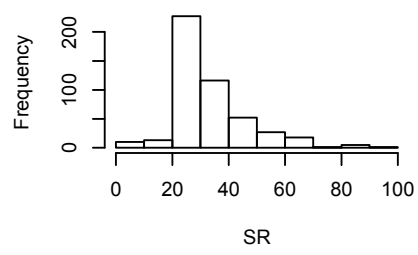

**4 X 4**

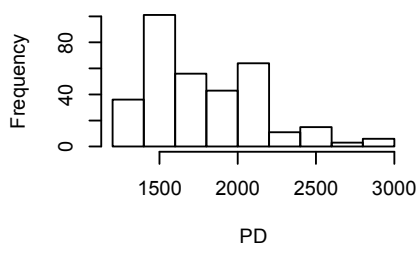

**4 X 4**

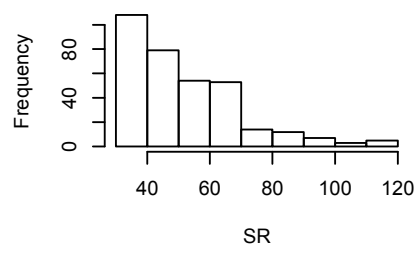

**8 X 8**

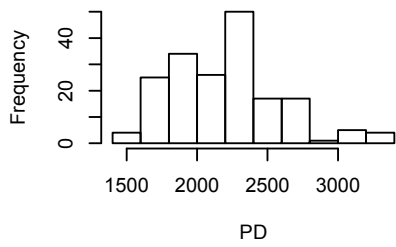

**8 X 8**

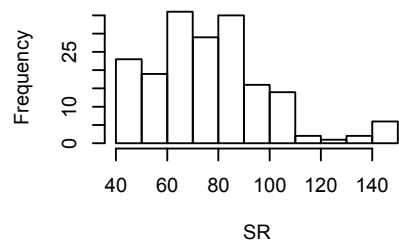

**14 X 14**

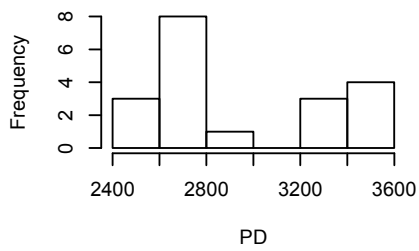

**14 X 14**

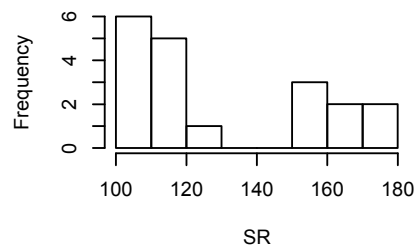

Supplement: Supplementary file 1 [file 1]
